1     **Title: Evolutionary differences in the ACE2 reveals the molecular**  
2                    **origins of COVID-19 susceptibility**

3  
4     **Authors: Ryan R. Cheng<sup>1\*</sup>, Esteban Doderro-Rojas<sup>1</sup>, Michele Di Pierro<sup>1,2</sup>, José**  
5                    **N. Onuchic<sup>1,3,4,5</sup>**

6  
7     **Affiliations:**

8     <sup>1</sup> Center for Theoretical Biological Physics, Rice University, Houston, Texas 77005.

9     <sup>2</sup> Department of Physics, Northeastern University, Boston, Massachusetts 02115.

10    <sup>3</sup> Department of Chemistry, Rice University, Houston, Texas 77005.

11    <sup>4</sup> Department of Physics & Astronomy, Rice University, Houston, Texas 77005.

12    <sup>5</sup> Department of Biosciences, Rice University, Houston, Texas 77005.

13    \*To whom the correspondence should be addressed: [ryan.r.cheng@gmail.com](mailto:ryan.r.cheng@gmail.com)

14  
15    **Abstract:**

16    We explore the energetic frustration patterns associated with the binding between the SARS-CoV-  
17    2 spike protein and the ACE2 receptor protein in a broad selection of animals. Using energy  
18    landscape theory and the concept of energy frustration—theoretical tools originally developed to  
19    study protein folding—we are able to identify interactions among residues of the spike protein and  
20    ACE2 that result in COVID-19 resistance. This allows us to identify whether or not a particular  
21    animal is susceptible to COVID-19 from the protein sequence of ACE2 alone. Our analysis  
22    predicts a number of experimental observations regarding COVID-19 susceptibility,  
23    demonstrating that this feature can be explained, at least partially, on the basis of theoretical means.

24

25

## 26 **Introduction**

27

28 The coronavirus disease 2019 (COVID-19) caused by the severe acute respiratory syndrome  
29 coronavirus 2 (SARS-CoV-2) has affected the lives of millions of people in a worldwide  
30 pandemic. The hallmark of COVID-19 is its high degree of contagiousness between individuals.

31

32 SARS-CoV-2 is believed to gain entry in to the host cell through its interaction with the  
33 Angiotensin-converting enzyme 2 (ACE2) receptor on the host cell surface[1], similar to SARS-  
34 CoV-1[2]. Recently, the structure of the SARS-CoV-2 viral spike glycoprotein bound to the  
35 human ACE2 receptor was determined using X-ray crystallography [3], providing a crucial  
36 starting point for any molecular modeling of the viral interaction with ACE2. The structure of  
37 this crucial complex has also been independently determined using cryo-EM[4] and X-ray  
38 crystallography[5].

39

40 What are the molecular interactions that give rise to interaction specificity between the viral  
41 spike and ACE2 receptor? Hints at the molecular origins of COVID-19 susceptibility can be  
42 found analyzing the susceptibility of different organisms to the coronavirus. The ACE2 receptors  
43 are found in a diverse span of the animal kingdom, including mammals, birds, and aquatic life,  
44 which have varying degrees of COVID-19 susceptibility[6-16].

45

46 For example, it is known that mice are immune to COVID-19 while on the contrary the Bronx  
47 Zoo tiger Nadia[12] had tested positive for COVID-19 and also exhibited many of the symptoms  
48 observed in infected humans. To date, a number of animals have been classified as either being  
49 susceptible or immune to COVID-19[6-16].

50

51 The evolutionary divergence in the sequences of the ACE2 receptor found in different organisms  
52 can be related to such susceptibility of infection[17-23]. Here, we explore the molecular  
53 mechanisms by which some sequence variants of the ACE2 receptor appear to confer resistance  
54 to infection by virtue of their reduced binding affinity to the viral spike protein. We examine the  
55 sequences for ACE2 receptor across a selection of 63 representative animals and identify the

56 residue interactions that are responsible for the reduced binding affinity, and thus COVID-19  
57 resistance, using the concept of energetic frustration from the theory of protein folding [24, 25].  
58 Here, energetic frustration refers to unfavorable interactions between residues in a given protein  
59 structure that cannot be mitigated without structural rearrangement or residue level mutations. In  
60 the context of the ACE2/spike complex, frustrated interactions between residues of the ACE2  
61 and the spike glycoprotein can also exist for a given structure of the protein complex.

62

63 The rarity of kinetics traps observed in the folding of proteins indicates that, in general, proteins  
64 do not exhibit a high amount of energetic frustration, which would instead create those kinetic  
65 traps[24, 25]. While folding kinetics suggest proteins to be “minimally frustrated”, some local  
66 frustration may be present; for example, local frustration could be functionally useful for tuning  
67 conformational dynamics. In protein complexes, a site frustrated in the monomeric protein may  
68 become less frustrated when the protein is bound to its counterparts, thus guiding specific  
69 association[26, 27].

70 In the case of the complex formed between the SARS-CoV-2 viral spike glycoprotein and the  
71 ACE2 receptor, we use changes in energy frustration as a proxy for changes in binding affinity.

72 We use the crystal structure of the viral spike bound to the human ACE2 as a template to  
73 construct molecular models of the interaction between the viral spike and the ACE2 receptors of  
74 these different animals. We then calculate the changes in frustration with respect to the reference  
75 point constituted by the human ACE2 sequence [26, 27]. This allows us to identify key residues  
76 of the ACE2 protein that appear to inhibit the binding of the spike glycoprotein and to predict  
77 whether or not a particular animal will be susceptible to COVID-19. The novelty of our approach  
78 and the key to our results resides in the fact that, while our procedure is based on the only input  
79 of the protein sequences of ACE2 receptor, our approach does incorporate a great deal of  
80 structural information about the protein complex, which is extracted from the crystal structure[3],  
81 and physico-chemical details about the energetics of protein folding and docking, which is  
82 synthesized in the energy function and results from decades of developments[24].

83

84

85

86

---

## 87 **Materials & Methods**

### 88 **ACE2 protein sequences**

89 The majority of ACE2 protein sequences were previously annotated from the genome assemblies  
90 and sequencing data from the DNA Zoo Consortium[28] (Available for download:  
91 <https://www.dnazoo.org/post/the-first-million-genes-are-the-hardest-to-make-r>). The full length  
92 protein sequences of the ACE2 proteins for mouse (*Mus musculus*), ferret (*Mustela putorius*  
93 *furo*), chicken (*Gallus gallus domesticus*), pig (*Sus*), duck (*Anas platyrhynchos*), Syrian golden  
94 hamster (*Mesocricetus auratus*), and mink (*Neovison vison*) were obtained from the Uniprot  
95 database[29] to supplement the sequences derived from the DNA Zoo. In total, 63 representative  
96 ACE2 sequences were used in our study (Table S1). For comparative analysis, a multiple  
97 sequence alignment was generated for the ACE2 sequences using Clustal Omega[30].

98

99

### 100 **Homology Modeling**

101 The crystal structure of the SARS-Cov-2 glycoprotein spike bound to the human ACE2 protein  
102 served as our starting template for constructing models of the glycoprotein spike bound to the  
103 ACE2 protein of other animals. We used the SWISS-MODEL [31] to create homology models of  
104 63 representative animals (Table S1) for a full list.

105

106

### 107 **Frustration Analysis**

108 We performed an energy landscape analysis on the predicted ACE2-spike complex for different  
109 animals using the configurational frustration index[26, 27]:

$$110 \quad F_{ij} = \frac{\left( H_{ij} - \langle H_{i'j'}^{decoy} \rangle \right)}{\sqrt{\frac{1}{N} \sum_{k=1}^N \left( H_{i'j'} - \langle H_{i'j'}^{decoy} \rangle \right)^2}} \quad (1)$$

111 Here,  $H_{ij}$  represents the pairwise interaction energy between residues  $i$  and  $j$  in a given structure  
112 using the Associative Memory, Water Mediated, Structure and Energy Model (AWSEM)[32], a

113 coarse-grained model widely used to study problems of protein folding and protein-protein  
114 association and assembly. The native energies  $H_{ij}$  are compared directly to  $N$  number of different  
115 configurational realizations between residues  $i$  and  $j$ , thereby generating a distribution of decoy  
116 energies with a mean of  $\langle H_{i'j'}^{decoy} \rangle$  and a standard deviation of  $\sqrt{N^{-1} \sum_{k=1}^N (H_{i'j'} - \langle H_{i'j'}^{decoy} \rangle)^2}$ . Hence,  
117  $F_{ij}$  is a type of Z-score that measures how favorable a particular pair of interactions are within a  
118 protein or protein complex with respect to a distribution of decoys. Frustrated (unfavorable  
119 interactions) are denoted by  $F_{ij} < 0$  while  $F_{ij} > 0$  are considered favorable; in particular,  $F_{ij} < -1$   
120 is considered highly frustrated while  $F_{ij} > 1$  is considered minimally frustrated.

121  
122 In our analysis, we found that it was useful to compare the configurational frustration between an  
123 interprotein residue pair with the same pair from the human ACE2-spike complex:

$$124 \quad \Delta F_{ij}^{(Species)} = F_{ij}^{(Species)} - F_{ij}^{(Human)} \quad (2)$$

125 We find that  $\Delta F_{ij}^{(Species)} < -1.5$  robustly identifies highly frustrated interactions that result in  
126 COVID-19 resistance. On the other hand, if all of the inter-protein residue interactions between  
127 the ACE2 receptor and the spike do not exhibit high levels of frustration (i.e.,  $\Delta F_{ij}^{(Species)} > -1$ )  
128 we identify that species as being highly susceptible to COVID-19. For completeness, if the most  
129 frustrated interprotein interactions fall between  $-1.5 < \Delta F_{ij}^{(Species)} \leq -1$  that species is predicted to  
130 be moderately susceptible.

131

### 132 **Evolutionary distance between ACE2 proteins**

133 The Jukes-Cantor distance is used to quantify the evolutionary distance between aligned ACE2  
134 proteins in our study:  $d = -\frac{19}{20} \log \left( 1 - \frac{20}{19} p \right)$ , where  $p$  is the p-distance—i.e., the number of  
135 residue sites between two compared sequences that are different divided by the sequence length  
136 of the multiple sequence alignment.

137

138

## 139 **Results & Discussion**

### 140 **Comparative frustration analysis of ACE2-spike complex for different species**

141 By examining the comparative differences between the inter-protein interactions with respect to  
142 the human ACE2-spike complex, we are able to identify residue-interactions outliers that  
143 represent a significant disruption to the ACE2/spike interaction relative to the human ACE2-  
144 spike interaction.

145

146 Shown in Figure 1 are plots of our frustration analysis for mouse (*Mus musculus*) and tiger  
147 (*Panthera tigris*), which are used as representative examples of animals have been  
148 experimentally observed to be resistant[14] and susceptible[12] to COVID-19, respectively.  
149 We observe a single frustrated residue pair between 31N of the mouse ACE2 and 484E of the  
150 spike protein on the map of configurational frustration (Figure 2A/2C), which appears as an  
151 outlier in the histogram of  $\Delta F_{ij}^{(Mouse)} \sim -2$ . Similar highly frustrated outliers can be found for the  
152 other animals that are known to resist COVID-19 (Figure S1), such as chicken (*Gallus gallus*  
153 *domesticus*)[6] and duck (*Anas*)[6]. We find that a threshold value of  $\Delta F_{ij}^{(Species)} < -1.5$  robustly  
154 identifies residue pairs that appear to confer COVID-19 resistance. Likewise, a histogram of  
155  $\Delta F_{ij}^{(Tiger)}$  exhibits comparable levels of frustration to that of the human ACE2 and spike (Figure  
156 1B)—similar findings are obtained for other animals with known susceptibilities to COVID-19  
157 (Figure S2), such as white-tailed deer (*Odocoileus virginianus*)[15], European rabbit  
158 (*Oryctolagus cuniculus*)[7], and pig (*Sus scrofa*)[13].

159

160 We further apply this analysis for identifying frustrated outliers in our other modeled complexes,  
161 thereby predicting whether a particular animal is susceptible to COVID-19. A detailed summary  
162 of our results is shown in Figure 2, which includes experimental observations that corroborate or  
163 are inconsistent with our predictions. Other animals that have been experimentally observed to  
164 be susceptible to COVID-19, such as mink (*Neovison vison*) [11], and Syrian golden hamster  
165 (*Mesocricetus auratus*)[9], are identified as being moderately susceptible by our computational  
166 approach. Coronavirus consensus PCR-primer sequences have been detected with high  
167 frequency in populations of straw-colored fruit bats (*Eidolon helvum*)[16], which have been  
168 predicted to exhibit moderate susceptibility by the computational approach.

169

170 Taken together, our findings summarized in Figure 2 show that an energy landscape-based  
171 approach can identify the molecular origins of COVID-19 susceptibility and resistance.  
172 Experimental observations corroborate 10 out of 12 of the computational predictions. One  
173 apparent inconsistency between the predictions and experimental observation regards the  
174 susceptibility of ferrets (*Mustela putorius furo*), which have been observed to replicate SARS-  
175 Cov-2 specifically in their upper respiratory tract[6]. Our analysis of the ferret ACE2-spike  
176 complex reveals a single highly frustrated inter-protein interaction between 34Y of ACE2 and  
177 403R of the spike protein. However, it has been noted[6, 19] that ferrets have a unique  
178 respiratory biology, which may offer an explanation for this apparent discrepancy. Another  
179 apparent inconsistency is observed with our predictions for dogs (*Canis lupus familiaris*). Our  
180 frustration analysis predicts two highly frustrated inter-protein contacts within the ACE2/spike  
181 complex: 33Y of ACE2 with 417K of the spike and 325E of the ACE2 with 502G of the spike.  
182 Yet the susceptibility of dogs still remains somewhat controversial—while viral susceptibility  
183 and the production of antibody responses have been detected in dogs[8], viral replication has  
184 been reported to be poor[6].

185

186 Our energy landscape-based predictions for COVID-19 susceptibility are closely related to  
187 similar approaches that examined sequence differences in ACE2 sequences of different animals  
188 in the context of a structural model of the ACE2/spike complex[18-20]. Frustration analysis  
189 yields a benefit to computational estimates of binding affinity because it compares the interaction  
190 energies between ACE2 and the spike glycoprotein with respect to alternative configurations  
191 (i.e., decoys) to assess how favorable a particular interaction is in the binding interface. In  
192 particular, the majority of our predictions are consistent with those of Damas et al[19], which  
193 makes predictions that are consistent with the same 10 out of 12 experiment observations that are  
194 highlighted in Figure 2. However, validation of the different models that exists is limited by the  
195 relatively small number of confirmed cases of COVID-19 in animals.

196

197 By in large, we find that our simple model appears to be consistent with many experimental  
198 observations of COVID-19 infections across different animals despite only considering the  
199 ACE2-spike protein interaction.

### A Mouse ACE2-spike

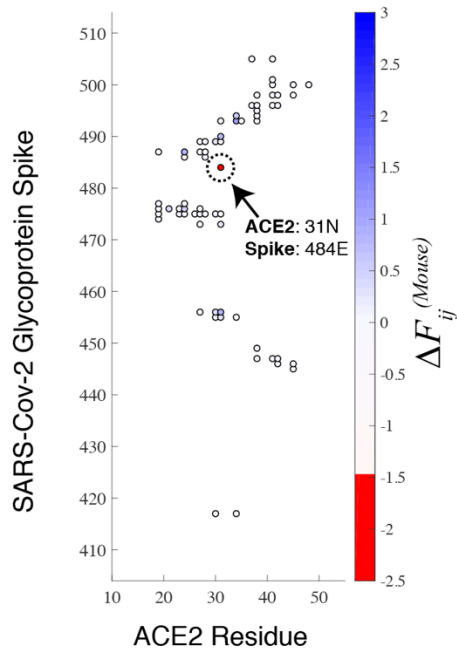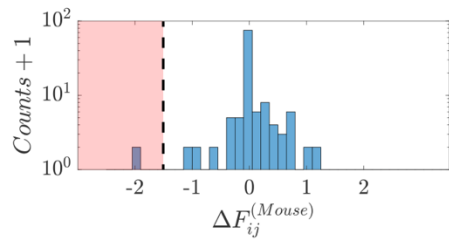

### B Tiger ACE2-spike

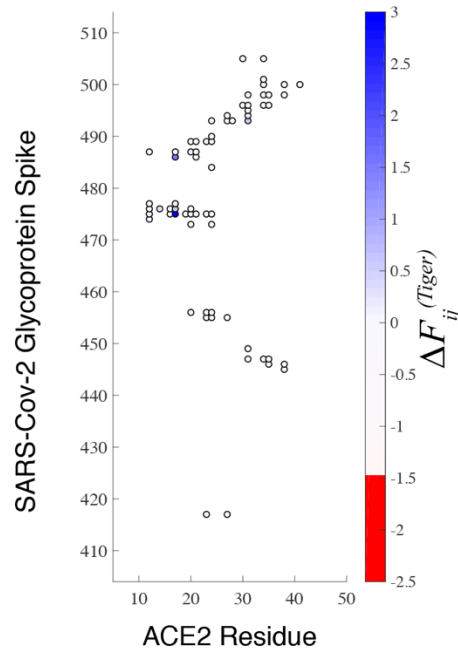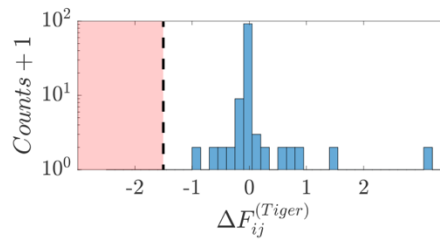

### C Predicted Structure of Mouse ACE2-spike Complex

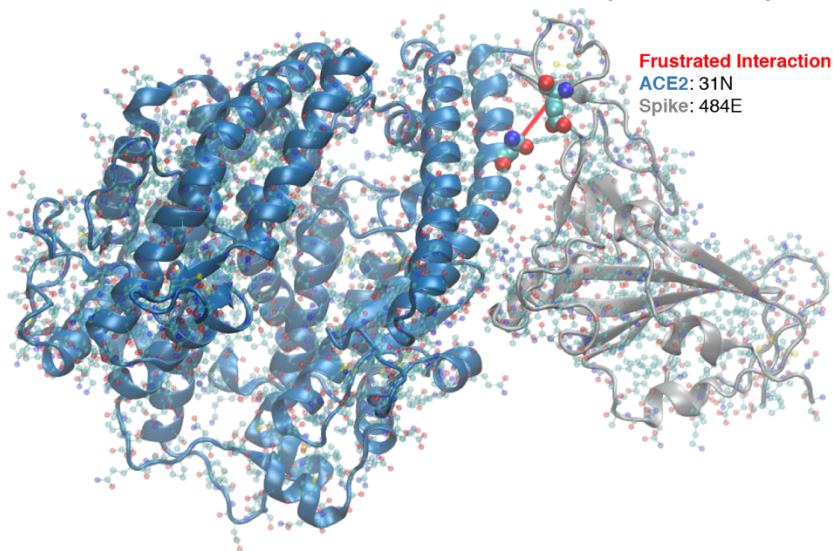



202 **Figure 1. Comparative analysis of the frustration indices with respect to those observed in**  
203 **human ACE2-spike complex reveals outliers that indicate COVID-19 resistance.** The  
204 configurational frustration index relative to the frustration in the human ACE2-spike complex is  
205 shown for (A) mouse (*Mus musculus*) and (B) tiger (*Panthera tigris*) on a contact map  
206 illustrating select contacts between the SARS-Cov-2 spike and the ACE2 protein. Corresponding  
207 histograms of the frustration index between all contacts between the ACE2 and spike protein are  
208 also shown. (A) and (B) are representative examples of animals that are resistant to COVID-19  
209 and susceptible to COVID-19, respectively. Animals that resist COVID-19 appear to have  
210 frustrated outliers that represent highly unfavorable residue interactions compared to the human  
211 ACE2-spike complex (i.e.,  $\Delta F_{ij}^{(Species)} < -1.5$ ). For the mouse, a single frustrated interaction  
212 between residue 31N of the ACE2 protein and 484E of the spike glycoprotein appears to confer  
213 COVID-19 resistance. (C) The frustrated interaction is plotted on the modeled 3D structure of  
214 the spike glycoprotein bound to the mouse ACE2 receptor.  
215

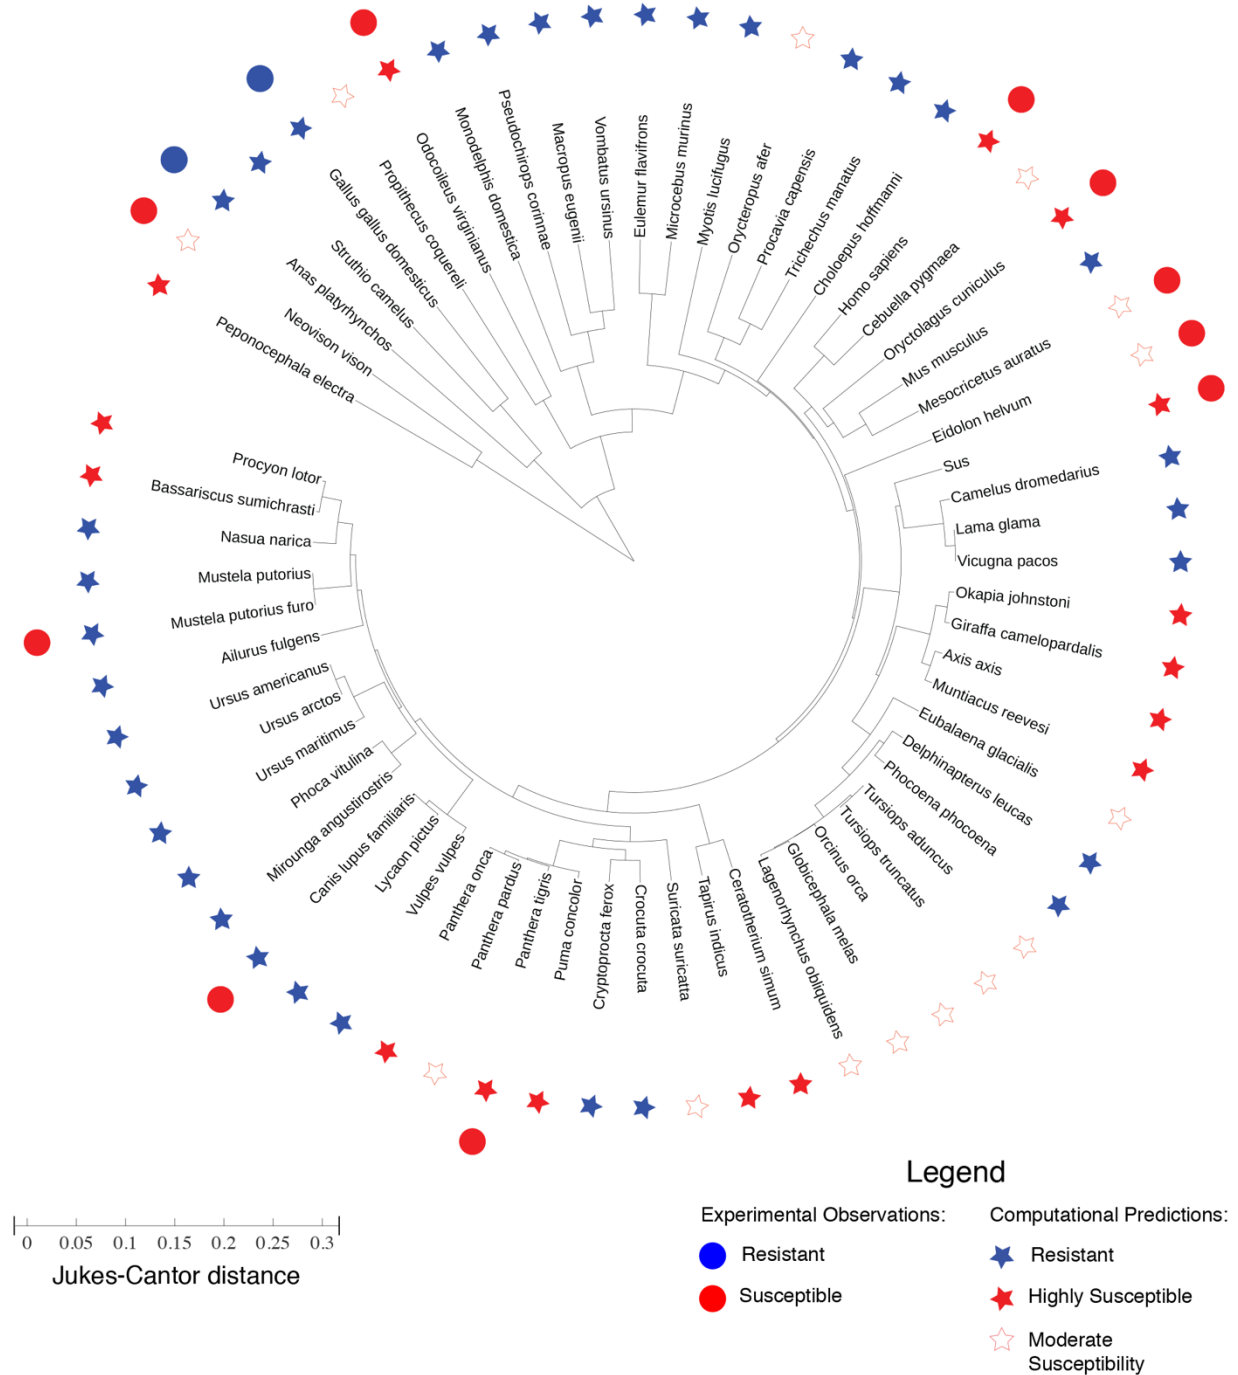

216

217 **Figure 2.**

218 **Phylogenetic tree representing the evolutionary distance between ACE2 proteins of different**  
 219 **species.** The lengths in the radial direction denote the Jukes-Cantor distance (See Materials &  
 220 Methods) as a measure of evolutionary distance between any two ACE2 proteins. The  
 221 experimental observation of SARS-CoV-2 resistance/susceptibility are plotted alongside the  
 222 computational predictions for resistance/susceptibility based on our frustration analysis of the

223 ACE2-spike complex. See the Legend for more details. There is a consistency between the  
224 computational predictions and the experimental observations for mouse (*Mus musculus*), chicken  
225 (*Gallus gallus domesticus*)[6], duck (*Anas platyrhynchos*)[6], mink (*Neovison vison*)[11], bat  
226 (*Eidolon helvum*)[16], Syrian golden hamster (*Mesocricetus auratus*)[9], tiger (*Panthera tigris*),  
227 white-tailed deer (*Odocoileus virginianus*)[15], European rabbit (*Oryctolagus cuniculus*)[7], and  
228 pig (*Sus scrofa*)[13]. However, apparent inconsistencies are found for ferret (*Mustela putorius*  
229 *furo*)[6] and dog (*Canis lupis familiaris*) [6, 8]—however, SARS-Cov-2 has only been observed  
230 to replicate in the upper respiratory tract of ferrets[6], and viral replication has been observed to  
231 be low in dogs[6].

232

233

## 234 **Conclusion**

235 The COVID-19 pandemic and the spread of other coronaviruses in recent years requires an  
236 indirect approach to understanding the molecular determinants behind susceptibility and  
237 resistance. Here, we constructed structural models of the ACE2-spike glycoprotein complex for a  
238 wide range of animals with ACE2 receptors. Using an energy landscape theory-based analysis  
239 we are able to uncover specific inter-protein interactions between the ACE2 and spike that  
240 appear to confer COVID-19 resistance. Our predictions appear to be consistent with many of the  
241 experimental observations regarding animal susceptibility, providing a structural explanation to  
242 those observations.

243

244 Our analysis reveals that the evolutionary distance between ACE2 proteins is not sufficient to  
245 predict COVID-19 susceptibility (Figure 2). Rather, an energy landscape-based analysis appears  
246 necessary to assess the interactions between the ACE2 protein and the SARS-Cov-2 spike  
247 glycoprotein.

248

## 249 Acknowledgements

250 The authors would like to thank Matthew MacManes, Erez Aiden, and Olga Dudchenko for  
251 helpful discussions and providing data and resources through the DNA Zoo. This work was  
252 supported by the Center for Theoretical Biological Physics sponsored by the National Science  
253 Foundation NSF Grant PHY-2019745. J.N.O. was also supported by the NSF-CHE-1614101  
254 and by the Welch Foundation (Grant C-1792). J.N.O. is a Cancer Prevention and Research  
255 Institute of Texas. Scholar in Cancer Research.

256  
257  
258  
259

- 260 1. Zhou, P., X.-L. Yang, et al., *A pneumonia outbreak associated with a new coronavirus of*  
261 *probable bat origin*. Nature, 2020. **579**(7798): p. 270-273.
- 262 2. Li, W., M.J. Moore, et al., *Angiotensin-converting enzyme 2 is a functional receptor for*  
263 *the SARS coronavirus*. Nature, 2003. **426**(6965): p. 450-454.
- 264 3. Wang, Q., Y. Zhang, et al., *Structural and Functional Basis of SARS-CoV-2 Entry by*  
265 *Using Human ACE2*. Cell, 2020. **181**(4): p. 894-904.e9.
- 266 4. Yan, R., Y. Zhang, Y. Li, L. Xia, Y. Guo, and Q. Zhou, *Structural basis for the*  
267 *recognition of SARS-CoV-2 by full-length human ACE2*. Science, 2020. **367**(6485): p.  
268 1444.
- 269 5. Shang, J., G. Ye, K. Shi, Y. Wan, C. Luo, H. Aihara, Q. Geng, A. Auerbach, and F. Li,  
270 *Structural basis of receptor recognition by SARS-CoV-2*. Nature, 2020. **581**(7807): p.  
271 221-224.
- 272 6. Shi, J., Z. Wen, et al., *Susceptibility of ferrets, cats, dogs, and other domesticated animals*  
273 *to SARS-coronavirus 2*. Science, 2020. **368**(6494): p. 1016.
- 274 7. Mykytyn, A.Z., M.M. Lamers, et al., *Susceptibility of rabbits to SARS-CoV-2*. bioRxiv,  
275 2020: p. 2020.08.27.263988.
- 276 8. Sit, T.H.C., C.J. Brackman, et al., *Infection of dogs with SARS-CoV-2*. Nature, 2020.  
277 **586**(7831): p. 776-778.
- 278 9. Sia, S.F., L.-M. Yan, et al., *Pathogenesis and transmission of SARS-CoV-2 in golden*  
279 *hamsters*. Nature, 2020. **583**(7818): p. 834-838.
- 280 10. Gautam, A., K. Kaphle, B. Shrestha, and S. Phuyal, *Susceptibility to SARS, MERS, and*  
281 *COVID-19 from animal health perspective*. Open Vet J, 2020. **10**(2): p. 164-177.
- 282 11. Oude Munnink, B.B., R.S. Sikkema, et al., *Transmission of SARS-CoV-2 on mink farms*  
283 *between humans and mink and back to humans*. Science, 2021. **371**(6525): p. 172.
- 284 12. Goldstein, J., *Bronx Zoo Tiger Is Sick With the Coronavirus*, in *New York Times*. 2020.
- 285 13. BS, P., S. G, P. MM, E.-H. C, M. E, M. P, and L. CE, *Susceptibility of Domestic Swine to*  
286 *Experimental Infection with Severe Acute Respiratory Syndrome Coronavirus 2*. Emerg  
287 Infect Dis., 2021. **27**(1): p. 104-112.
- 288 14. Muñoz-Fontela, C., W.E. Dowling, et al., *Animal models for COVID-19*. Nature, 2020.  
289 **586**(7830): p. 509-515.
- 290 15. Palmer, M.V., M. Martins, et al., *Susceptibility of white-tailed deer*  
291 *(*Odocoileus virginianus*) to SARS-CoV-2*. bioRxiv, 2021: p.  
292 2021.01.13.426628.

- 293 16. Kumakamba, C., F.R. Niama, et al., *Coronavirus surveillance in Congo basin wildlife*  
294 *detects RNA of multiple species circulating in bats and rodents*. bioRxiv, 2020: p.  
295 2020.07.20.211664.
- 296 17. Martínez-Hernández, F., A.B. Isaak-Delgado, J.A. Alfonso-Toledo, C.I. Muñoz-García,  
297 G. Villalobos, N. Aréchiga-Ceballos, and E. Rendón-Franco, *Assessing the SARS-CoV-2*  
298 *threat to wildlife: Potential risk to a broad range of mammals*. Perspectives in Ecology  
299 and Conservation, 2020.
- 300 18. Lam, S.D., N. Bordin, et al., *SARS-CoV-2 spike protein predicted to form complexes with*  
301 *host receptor protein orthologues from a broad range of mammals*. Scientific Reports,  
302 2020. **10**(1): p. 16471.
- 303 19. Damas, J., G.M. Hughes, et al., *Broad host range of SARS-CoV-2 predicted by*  
304 *comparative and structural analysis of ACE2 in vertebrates*. Proceedings of the National  
305 Academy of Sciences, 2020. **117**(36): p. 22311.
- 306 20. Luan, J., Y. Lu, X. Jin, and L. Zhang, *Spike protein recognition of mammalian ACE2*  
307 *predicts the host range and an optimized ACE2 for SARS-CoV-2 infection*. Biochemical  
308 and Biophysical Research Communications, 2020. **526**(1): p. 165-169.
- 309 21. Becker, D.J., G.F. Albery, et al., *Predicting wildlife hosts of betacoronaviruses for SARS-*  
310 *CoV-2 sampling prioritization: a modeling study*. bioRxiv, 2020: p. 2020.05.22.111344.
- 311 22. Melin, A.D., M.C. Janiak, F. Marrone, P.S. Arora, and J.P. Higham, *Comparative ACE2*  
312 *variation and primate COVID-19 risk*. Communications Biology, 2020. **3**(1): p. 641.
- 313 23. Frank, H.K., D. Enard, and S.D. Boyd, *Exceptional diversity and selection pressure on*  
314 *SARS-CoV and SARS-CoV-2 host receptor in bats compared to other mammals*. bioRxiv,  
315 2020: p. 2020.04.20.051656.
- 316 24. Onuchic, J.N. and P.G. Wolynes, *Theory of protein folding*. Current Opinion in Structural  
317 Biology, 2004. **14**(1): p. 70-75.
- 318 25. Onuchic, J.N., Z. Luthey-Schulten, and P.G. Wolynes, *THEORY OF PROTEIN*  
319 *FOLDING: The Energy Landscape Perspective*. Annual Review of Physical Chemistry,  
320 1997. **48**(1): p. 545-600.
- 321 26. Ferreiro, D.U., J.A. Hegler, E.A. Komives, and P.G. Wolynes, *Localizing frustration in*  
322 *native proteins and protein assemblies*. Proceedings of the National Academy of  
323 Sciences, 2007. **104**(50): p. 19819.
- 324 27. Parra, R.G., N.P. Schafer, L.G. Radusky, M.-Y. Tsai, A.B. Guzovsky, P.G. Wolynes, and  
325 D.U. Ferreiro, *Protein Frustratometer 2: a tool to localize energetic frustration in protein*  
326 *molecules, now with electrostatics*. Nucleic Acids Research, 2016. **44**(W1): p. W356-  
327 W360.
- 328 28. Dudchenko, O., S.S. Batra, et al., *De novo assembly of the <em>Aedes*  
329 *aegypti</em> genome using Hi-C yields chromosome-length scaffolds*. Science,  
330 2017. **356**(6333): p. 92.
- 331 29. The UniProt, C., *UniProt: the universal protein knowledgebase in 2021*. Nucleic Acids  
332 Research, 2021. **49**(D1): p. D480-D489.
- 333 30. Madeira, F., Y.M. Park, et al., *The EMBL-EBI search and sequence analysis tools APIs*  
334 *in 2019*. Nucleic acids research, 2019. **47**(W1): p. W636-W641.
- 335 31. Waterhouse, A., M. Bertoni, et al., *SWISS-MODEL: homology modelling of protein*  
336 *structures and complexes*. Nucleic Acids Research, 2018. **46**(W1): p. W296-W303.
- 337 32. Davtayan, A., N.P. Schafer, W. Zheng, C. Clementi, P.G. Wolynes, and G.A. Papoian,  
338 *AWSEM-MD: Protein Structure Prediction Using Coarse-Grained Physical Potentials*

339            *and Bioinformatically Based Local Structure Biasing*. The Journal of Physical Chemistry  
340            B, 2012. **116**(29): p. 8494-8503.  
341
