1     **Title: Evolutionary differences in the ACE2 reveals the molecular**  
2                   **origins of COVID-19 susceptibility**

3  
4     **Authors: Ryan R. Cheng<sup>1\*</sup>, Esteban Doderro-Rojas<sup>1</sup>, Michele Di Pierro<sup>1,2</sup>, José**  
5                   **N. Onuchic<sup>1,3,4,5,\*</sup>**

6  
7     **Affiliations:**

8     <sup>1</sup> Center for Theoretical Biological Physics, Rice University, Houston, Texas 77005.

9     <sup>2</sup> Department of Physics, Northeastern University, Boston, Massachusetts 02115.

10    <sup>3</sup> Department of Chemistry, Rice University, Houston, Texas 77005.

11    <sup>4</sup> Department of Physics & Astronomy, Rice University, Houston, Texas 77005.

12    <sup>5</sup> Department of Biosciences, Rice University, Houston, Texas 77005.

13    \*To whom the correspondence should be addressed: [ryan.r.cheng@gmail.com](mailto:ryan.r.cheng@gmail.com), [jonuchic@rice.edu](mailto:jonuchic@rice.edu)

14

15    **Abstract:**

16    We explore the energetic frustration patterns associated with the binding between the SARS-CoV-  
17    2 spike protein and the ACE2 receptor protein in a broad selection of animals. Using energy  
18    landscape theory and the concept of energy frustration—theoretical tools originally developed to  
19    study protein folding—we are able to identify interactions among residues of the spike protein and  
20    ACE2 that result in COVID-19 resistance. This allows us to identify whether or not a particular  
21    animal is susceptible to COVID-19 from the protein sequence of ACE2 alone. Our analysis  
22    predicts a number of experimental observations regarding COVID-19 susceptibility,  
23    demonstrating that this feature can be explained, at least partially, on the basis of theoretical means.

24

25

## 26 **Introduction**

27

28 The coronavirus disease 2019 (COVID-19) caused by the severe acute respiratory syndrome  
29 coronavirus 2 (SARS-CoV-2) has affected the lives of millions of people in a worldwide  
30 pandemic. The hallmark of COVID-19 is its high degree of contagiousness between individuals.

31

32 SARS-CoV-2 is believed to gain entry in to the host cell through its interaction with the  
33 Angiotensin-converting enzyme 2 (ACE2) receptor on the host cell surface(Zhou et al., 2020),  
34 similar to SARS-CoV-1(Li et al., 2003). Recently, the structure of the SARS-CoV-2 viral spike  
35 glycoprotein bound to the human ACE2 receptor was determined using X-ray crystallography  
36 (Wang et al., 2020), providing a crucial starting point for any molecular modeling of the viral  
37 interaction with ACE2. The structure of this crucial complex has also been independently  
38 determined using cryo-EM(Yan et al., 2020) and X-ray crystallography(Shang et al., 2020).

39

40 What are the molecular interactions that give rise to interaction specificity between the viral  
41 spike and ACE2 receptor? Hints at the molecular origins of COVID-19 susceptibility can be  
42 found analyzing the susceptibility of different organisms to the coronavirus. The ACE2 receptors  
43 are found in a diverse span of the animal kingdom, including mammals, birds, and aquatic life,  
44 which have varying degrees of COVID-19 susceptibility(BS et al., 2021; Gautam, Kaphle,  
45 Shrestha, & Phuyal, 2020; Goldstein, 2020; Kumakamba et al., 2020; Muñoz-Fontela et al.,  
46 2020; Mykytyn et al., 2020; Oude Munnink et al., 2021; Palmer et al., 2021; Shi et al., 2020; Sia  
47 et al., 2020; Sit et al., 2020).

48

49 For example, it is known that mice are immune to COVID-19 while on the contrary the Bronx  
50 Zoo tiger Nadia(Goldstein, 2020) had tested positive for COVID-19 and also exhibited many of  
51 the symptoms observed in infected humans. To date, a number of animals have been classified as  
52 either being susceptible or immune to COVID-19(BS et al., 2021; Gautam et al., 2020;  
53 Goldstein, 2020; Kumakamba et al., 2020; Muñoz-Fontela et al., 2020; Mykytyn et al., 2020;  
54 Oude Munnink et al., 2021; Palmer et al., 2021; Shi et al., 2020; Sia et al., 2020; Sit et al., 2020).

55

56 The evolutionary divergence in the sequences of the ACE2 receptor found in different organisms  
57 can be related to such susceptibility of infection(Becker et al., 2020; Damas et al., 2020; Frank,  
58 Enard, & Boyd, 2020; Lam et al., 2020; Luan, Lu, Jin, & Zhang, 2020; Martínez-Hernández et  
59 al., 2020; Melin, Janiak, Marrone, Arora, & Higham, 2020). Here, we explore the molecular  
60 mechanisms by which some sequence variants of the ACE2 receptor appear to confer resistance  
61 to infection by virtue of their reduced binding affinity to the viral spike protein. We examine the  
62 sequences for ACE2 receptor across a selection of 63 representative animals and identify the  
63 residue interactions that are responsible for the reduced binding affinity, and thus COVID-19  
64 resistance, using the concept of energetic frustration from the theory of protein folding (Onuchic,  
65 Luthey-Schulten, & Wolynes, 1997; Onuchic & Wolynes, 2004). Here, energetic frustration  
66 refers to unfavorable interactions between residues in a given protein structure that cannot be  
67 mitigated without structural rearrangement or residue level mutations. In the context of the  
68 ACE2/spike complex, frustrated interactions between residues of the ACE2 and the spike  
69 glycoprotein can also exist for a given structure of the protein complex.

70

71 The rarity of kinetics traps observed in the folding of proteins indicates that, in general, proteins  
72 do not exhibit a high amount of energetic frustration, which would instead create those kinetic  
73 traps(Onuchic et al., 1997; Onuchic & Wolynes, 2004). While folding kinetics suggest proteins  
74 to be “minimally frustrated”, some local frustration may be present; for example, local  
75 frustration could be functionally useful for tuning conformational dynamics. In protein  
76 complexes, a site frustrated in the monomeric protein may become less frustrated when the  
77 protein is bound to its counterparts, thus guiding specific association(Ferreiro, Hegler, Komives,  
78 & Wolynes, 2007; Parra et al., 2016).

79 In the case of the complex formed between the SARS-CoV-2 viral spike glycoprotein and the  
80 ACE2 receptor, we use changes in energy frustration as a proxy for changes in binding affinity.

81 We use the crystal structure of the viral spike bound to the human ACE2 as a template to  
82 construct molecular models of the interaction between the viral spike and the ACE2 receptors of  
83 these different animals. We then calculate the changes in frustration with respect to the reference  
84 point constituted by the human ACE2 sequence (Ferreiro et al., 2007; Parra et al., 2016). This  
85 allows us to identify key residues of the ACE2 protein that appear to inhibit the binding of the  
86 spike glycoprotein and to predict whether or not a particular animal will be susceptible to

87 COVID-19. The novelty of our approach and the key to our results resides in the fact that, while  
88 our procedure is based on the only input of the protein sequences of ACE2 receptor, our  
89 approach does incorporate a great deal of structural information about the protein complex,  
90 which is extracted from the crystal structure(Wang et al., 2020), and physico-chemical details  
91 about the energetics of protein folding and docking, which is synthesized in the energy function  
92 and results from decades of developments(Onuchic & Wolynes, 2004).

93

94

95

96

---

## 97 **Materials & Methods**

### 98 **ACE2 protein sequences**

99 The majority of ACE2 protein sequences were previously annotated from the genome assemblies  
100 and sequencing data from the DNA Zoo Consortium(Dudchenko et al., 2017) (Available for  
101 download: <https://www.dnazoo.org/post/the-first-million-genes-are-the-hardest-to-make-r>). The  
102 full length protein sequences of the ACE2 proteins for mouse (*Mus musculus*), ferret (*Mustela*  
103 *putorius furo*), chicken (*Gallus gallus domesticus*), pig (*Sus*), duck (*Anas platyrhynchos*), Syrian  
104 golden hamster (*Mesocricetus auratus*), and mink (*Neovison vison*) were obtained from the  
105 Uniprot database(The UniProt, 2021) to supplement the sequences derived from the DNA Zoo.  
106 In total, 63 representative ACE2 sequences were used in our study (Table S1). For comparative  
107 analysis, a multiple sequence alignment was generated for the ACE2 sequences using Clustal  
108 Omega(Madeira et al., 2019).

109

110

### 111 **Homology Modeling**

112 The crystal structure of the SARS-Cov-2 glycoprotein spike bound to the human ACE2 protein  
113 served as our starting template for constructing models of the glycoprotein spike bound to the  
114 ACE2 protein of other animals. We used the SWISS-MODEL (Waterhouse et al., 2018) to create  
115 homology models of 63 representative animals (Table S1) for a full list.

116

117

## 118 Frustration Analysis

119 We performed an energy landscape analysis on the predicted ACE2-spike complex for different  
120 animals using the configurational frustration index (Ferreiro et al., 2007; Parra et al., 2016):

$$121 \quad F_{ij} = \frac{\left( H_{ij} - \langle H_{i'j'}^{decoy} \rangle \right)}{\sqrt{\frac{1}{N} \sum_{k=1}^N \left( H_{i'j'} - \langle H_{i'j'}^{decoy} \rangle \right)^2}} \quad (1)$$

122 Here,  $H_{ij}$  represents the pairwise interaction energy between residues  $i$  and  $j$  in a given structure  
123 using the Associative Memory, Water Mediated, Structure and Energy Model

124 (AWSEM) (Davtyan et al., 2012), a coarse-grained model widely used to study problems of  
125 protein folding and protein-protein association and assembly. The native energies  $H_{ij}$  are

126 compared directly to  $N$  number of different configurational realizations between residues  $i$  and  $j$ ,

127 thereby generating a distribution of decoy energies with a mean of  $\langle H_{i'j'}^{decoy} \rangle$  and a standard

128 deviation of  $\sqrt{N^{-1} \sum_{k=1}^N \left( H_{i'j'} - \langle H_{i'j'}^{decoy} \rangle \right)^2}$ . Hence,  $F_{ij}$  is a type of Z-score that measures how

129 favorable a particular pair of interactions are within a protein or protein complex with respect to

130 a distribution of decoys. Frustrated (unfavorable interactions) are denoted by  $F_{ij} < 0$  while  $F_{ij} > 0$

131 are considered favorable; in particular,  $F_{ij} < -1$  is considered highly frustrated while  $F_{ij} > 1$  is

132 considered minimally frustrated.

133

134 In our analysis, we found that it was useful to compare the configurational frustration between an  
135 interprotein residue pair with the same pair from the human ACE2-spike complex:

$$136 \quad \Delta F_{ij}^{(Species)} = F_{ij}^{(Species)} - F_{ij}^{(Human)} \quad (2)$$

137 We find that  $\Delta F_{ij}^{(Species)} < -1.5$  robustly identifies highly frustrated interactions that result in

138 COVID-19 resistance. On the other hand, if all of the inter-protein residue interactions between

139 the ACE2 receptor and the spike do not exhibit high levels of frustration (i.e.,  $\Delta F_{ij}^{(Species)} > -1$ )

140 we identify that species as being highly susceptible to COVID-19. For completeness, if the most

141 frustrated interprotein interactions fall between  $-1.5 < \Delta F_{ij}^{(Species)} \leq -1$  that species is predicted to  
142 be moderately susceptible.

143

### 144 **Evolutionary distance between ACE2 proteins**

145 The Jukes-Cantor distance is used to quantify the evolutionary distance between aligned ACE2

146 proteins in our study:  $d = -\frac{19}{20} \log\left(1 - \frac{20}{19} p\right)$ , where  $p$  is the p-distance—i.e., the number of

147 residue sites between two compared sequences that are different divided by the sequence length  
148 of the multiple sequence alignment.

149

150

## 151 **Results & Discussion**

### 152 **Comparative frustration analysis of ACE2-spike complex for different species**

153 By examining the comparative differences between the inter-protein interactions with respect to  
154 the human ACE2-spike complex, we are able to identify residue-interactions outliers that  
155 represent a significant disruption to the ACE2/spike interaction relative to the human ACE2-  
156 spike interaction.

157

158 Shown in Figure 1 are plots of our frustration analysis for mouse (*Mus musculus*) and tiger  
159 (*Panthera tigris*), which are used as representative examples of animals have been  
160 experimentally observed to be resistant(Muñoz-Fontela et al., 2020) and susceptible(Goldstein,  
161 2020) to COVID-19, respectively.

162 We observe a single frustrated residue pair between 31N of the mouse ACE2 and 484E of the  
163 spike protein on the map of configurational frustration (Figure 2A/2C), which appears as an  
164 outlier in the histogram of  $\Delta F_{ij}^{(Mouse)} \sim -2$ . Similar highly frustrated outliers can be found for the  
165 other animals that are known to resist COVID-19 (Figure S1), such as chicken (*Gallus gallus*  
166 *domesticus*)(Shi et al., 2020) and duck (*Anas*)(Shi et al., 2020). We find that a threshold value of  
167  $\Delta F_{ij}^{(Species)} < -1.5$  robustly identifies residue pairs that appear to confer COVID-19 resistance.

168 Likewise, a histogram of  $\Delta F_{ij}^{(Tiger)}$  exhibits comparable levels of frustration to that of the human

169 ACE2 and spike (Figure 1B)—similar findings are obtained for other animals with known  
170 susceptibilities to COVID-19 (Figure S2), such as white-tailed deer (*Odocoileus*  
171 *virginianus*)(Palmer et al., 2021), European rabbit (*Oryctolagus cuniculus*)(Mykytyn et al.,  
172 2020), and pig (*Sus scrofa*)(BS et al., 2021).

173

174 We further apply this analysis for identifying frustrated outliers in our other modeled complexes,  
175 thereby predicting whether a particular animal is susceptible to COVID-19. A detailed summary  
176 of our results is shown in Figure 2, which includes experimental observations that corroborate or  
177 are inconsistent with our predictions. Other animals that have been experimentally observed to  
178 be susceptible to COVID-19, such as mink (*Neovison vison*) (Oude Munnink et al., 2021), and  
179 Syrian golden hamster (*Mesocricetus auratus*)(Sia et al., 2020), are identified as being  
180 moderately susceptible by our computational approach. Coronavirus consensus PCR-primer  
181 sequences have been detected with high frequency in populations of straw-colored fruit bats  
182 (*Eidolon helvum*)(Kumakamba et al., 2020), which have been predicted to exhibit moderate  
183 susceptibility by the computational approach.

184

185 Taken together, our findings summarized in Figure 2 show that an energy landscape-based  
186 approach can identify the molecular origins of COVID-19 susceptibility and resistance.  
187 Experimental observations corroborate 10 out of 12 of the computational predictions. One  
188 apparent inconsistency between the predictions and experimental observation regards the  
189 susceptibility of ferrets (*Mustela putorius furo*), which have been observed to replicate SARS-  
190 Cov-2 specifically in their upper respiratory tract(Shi et al., 2020). Our analysis of the ferret  
191 ACE2-spike complex reveals a single highly frustrated inter-protein interaction between 34Y of  
192 ACE2 and 403R of the spike protein. However, it has been noted(Damas et al., 2020; Shi et al.,  
193 2020) that ferrets have a unique respiratory biology, which may offer an explanation for this  
194 apparent discrepancy. Another apparent inconsistency is observed with our predictions for dogs  
195 (*Canis lupus familiaris*). Our frustration analysis predicts two highly frustrated inter-protein  
196 contacts within the ACE2/spike complex: 33Y of ACE2 with 417K of the spike and 325E of the  
197 ACE2 with 502G of the spike. Yet the susceptibility of dogs still remains somewhat  
198 controversial—while viral susceptibility and the production of antibody responses have been  
199 detected in dogs(Sit et al., 2020), viral replication has been reported to be poor(Shi et al., 2020).

200

201 Our energy landscape-based predictions for COVID-19 susceptibility are closely related to  
202 similar approaches that examined sequence differences in ACE2 sequences of different animals  
203 in the context of a structural model of the ACE2/spike complex(Damas et al., 2020; Lam et al.,  
204 2020; Luan et al., 2020). Frustration analysis yields a benefit to computational estimates of  
205 binding affinity because it compares the interaction energies between ACE2 and the spike  
206 glycoprotein with respect to alternative configurations (i.e., decoys) to assess how favorable a  
207 particular interaction is in the binding interface. In particular, the majority of our predictions are  
208 consistent with those of Damas et al(Damas et al., 2020), which makes predictions that are  
209 consistent with the same 10 out of 12 experiment observations that are highlighted in Figure 2.  
210 However, validation of the different models that exists is limited by the relatively small number  
211 of confirmed cases of COVID-19 in animals.

212

213 By in large, we find that our simple model appears to be consistent with many experimental  
214 observations of COVID-19 infections across different animals despite only considering the  
215 ACE2-spike protein interaction.



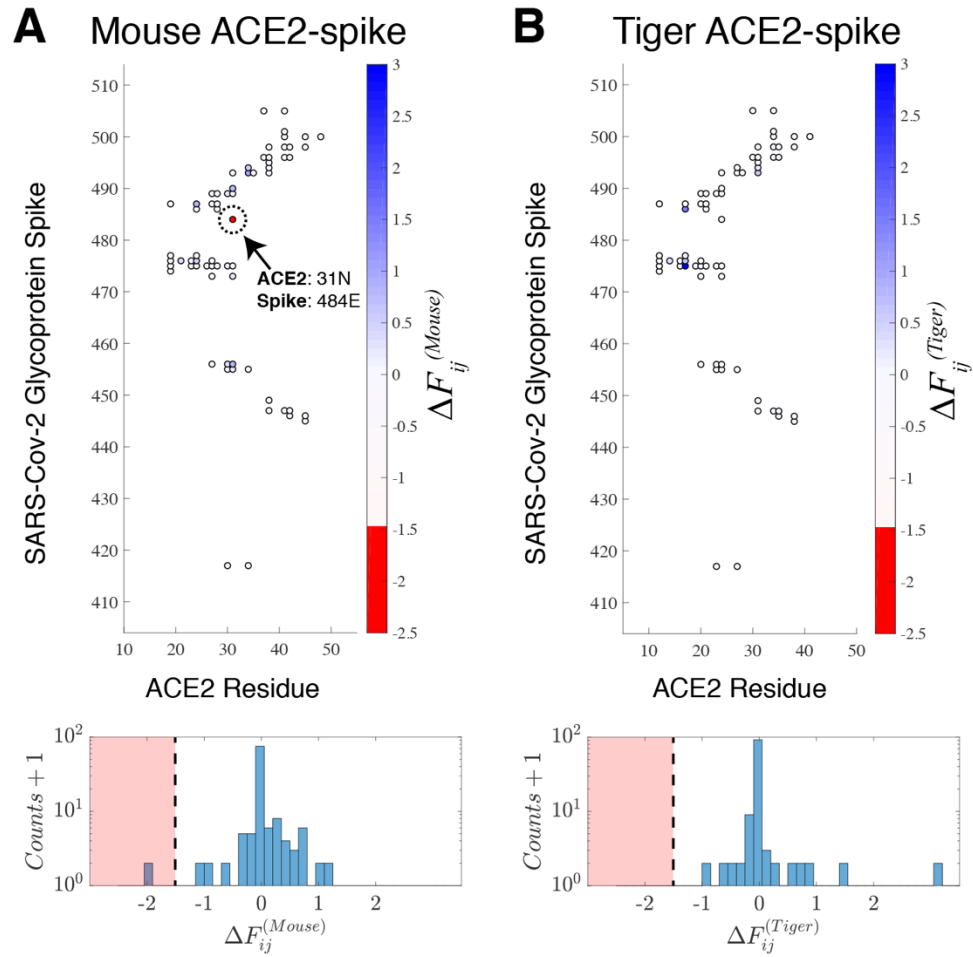

**C** Predicted Structure of Mouse ACE2-spike Complex

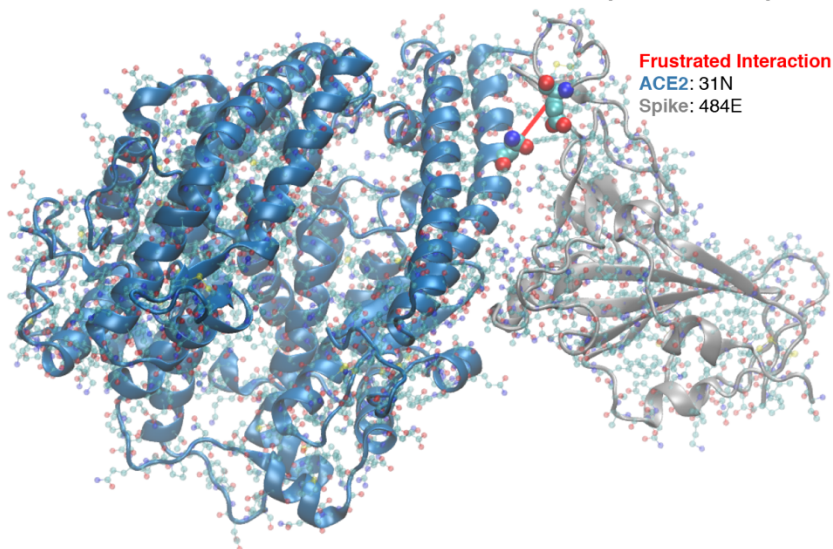

218 **Figure 1. Comparative analysis of the frustration indices with respect to those observed in**  
219 **human ACE2-spike complex reveals outliers that indicate COVID-19 resistance.** The  
220 configurational frustration index relative to the frustration in the human ACE2-spike complex is  
221 shown for (A) mouse (*Mus musculus*) and (B) tiger (*Panthera tigris*) on a contact map  
222 illustrating select contacts between the SARS-Cov-2 spike and the ACE2 protein. Corresponding  
223 histograms of the frustration index between all contacts between the ACE2 and spike protein are  
224 also shown. (A) and (B) are representative examples of animals that are resistant to COVID-19  
225 and susceptible to COVID-19, respectively. Animals that resist COVID-19 appear to have  
226 frustrated outliers that represent highly unfavorable residue interactions compared to the human  
227 ACE2-spike complex (i.e.,  $\Delta F_{ij}^{(Species)} < -1.5$ ). For the mouse, a single frustrated interaction  
228 between residue 31N of the ACE2 protein and 484E of the spike glycoprotein appears to confer  
229 COVID-19 resistance. (C) The frustrated interaction is plotted on the modeled 3D structure of  
230 the spike glycoprotein bound to the mouse ACE2 receptor.  
231

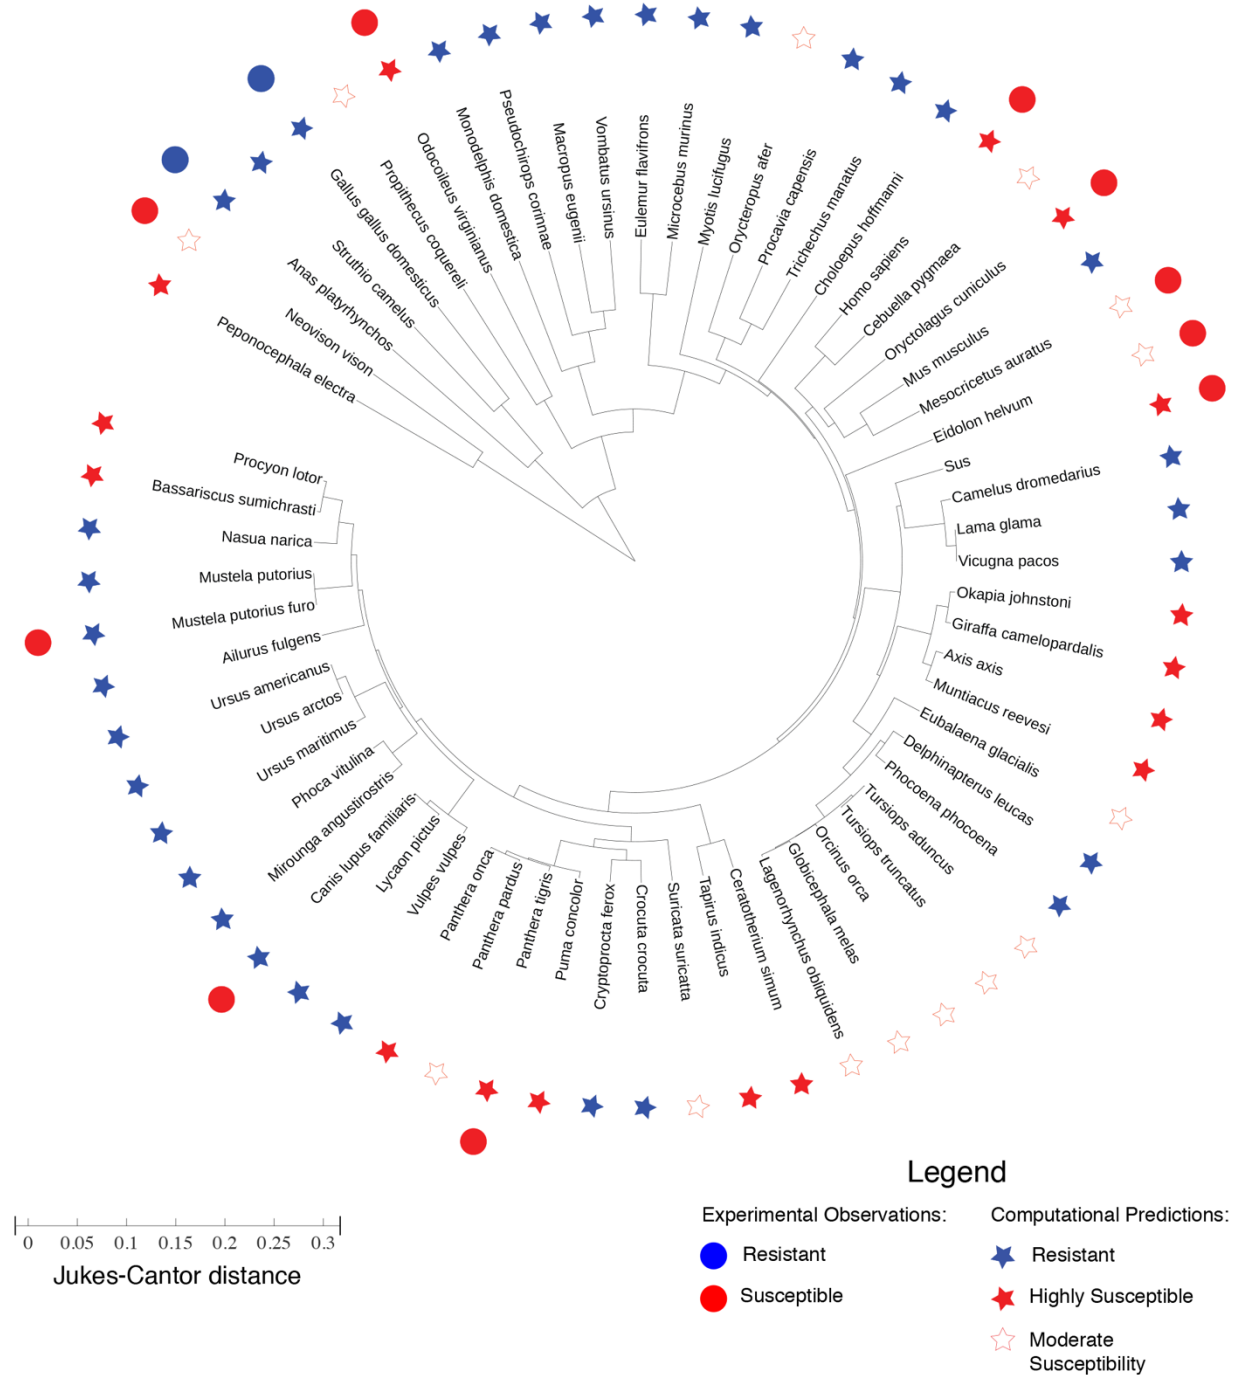

232

233 **Figure 2.**

234 **Phylogenetic tree representing the evolutionary distance between ACE2 proteins of different**  
 235 **species.** The lengths in the radial direction denote the Jukes-Cantor distance (See Materials &  
 236 Methods) as a measure of evolutionary distance between any two ACE2 proteins. The  
 237 experimental observation of SARS-CoV-2 resistance/susceptibility are plotted alongside the  
 238 computational predictions for resistance/susceptibility based on our frustration analysis of the

239 ACE2-spike complex. See the Legend for more details. There is a consistency between the  
240 computational predictions and the experimental observations for mouse (*Mus musculus*), chicken  
241 (*Gallus gallus domesticus*)(Shi et al., 2020), duck (*Anas platyrhynchos*)(Shi et al., 2020), mink  
242 (*Neovison vison*)(Oude Munnink et al., 2021), bat (*Eidolon helvum*)(Kumakamba et al., 2020),  
243 Syrian golden hamster (*Mesocricetus auratus*)(Sia et al., 2020), tiger (*Panthera tigris*), white-  
244 tailed deer (*Odocoileus virginianus*)(Palmer et al., 2021), European rabbit (*Oryctolagus*  
245 *cuniculus*)(Mykytyn et al., 2020), and pig (*Sus scrofa*)(BS et al., 2021). However, apparent  
246 inconsistencies are found for ferret (*Mustela putorius furo*)(Shi et al., 2020) and dog (*Canis lupis*  
247 *familiaris*) (Shi et al., 2020; Sit et al., 2020)—however, SARS-Cov-2 has only been observed to  
248 replicate in the upper respiratory tract of ferrets(Shi et al., 2020), and viral replication has been  
249 observed to be low in dogs(Shi et al., 2020).

250

251

## 252 **Conclusion**

253 The COVID-19 pandemic and the spread of other coronaviruses in recent years requires an  
254 indirect approach to understanding the molecular determinants behind susceptibility and  
255 resistance. Here, we constructed structural models of the ACE2-spike glycoprotein complex for a  
256 wide range of animals with ACE2 receptors. Using an energy landscape theory-based analysis  
257 we are able to uncover specific inter-protein interactions between the ACE2 and spike that  
258 appear to confer COVID-19 resistance. Our predictions appear to be consistent with many of the  
259 experimental observations regarding animal susceptibility, providing a structural explanation to  
260 those observations.

261

262 Our analysis reveals that the evolutionary distance between ACE2 proteins is not sufficient to  
263 predict COVID-19 susceptibility (Figure 2). Rather, an energy landscape-based analysis appears  
264 necessary to assess the interactions between the ACE2 protein and the SARS-Cov-2 spike  
265 glycoprotein.

266

## 267 **Acknowledgements**

268 The authors would like to thank Matthew MacManes, Erez Aiden, and Olga Dudchenko for  
269 helpful discussions and providing data and resources through the DNA Zoo. This work was  
270 supported by the Center for Theoretical Biological Physics sponsored by the National Science  
271 Foundation NSF Grant PHY-2019745. J.N.O. was also supported by the NSF-CHE-1614101  
272 and by the Welch Foundation (Grant C-1792). J.N.O. is a Cancer Prevention and Research  
273 Institute of Texas. Scholar in Cancer Research.  
274  
275

## A Chicken ACE2-spike

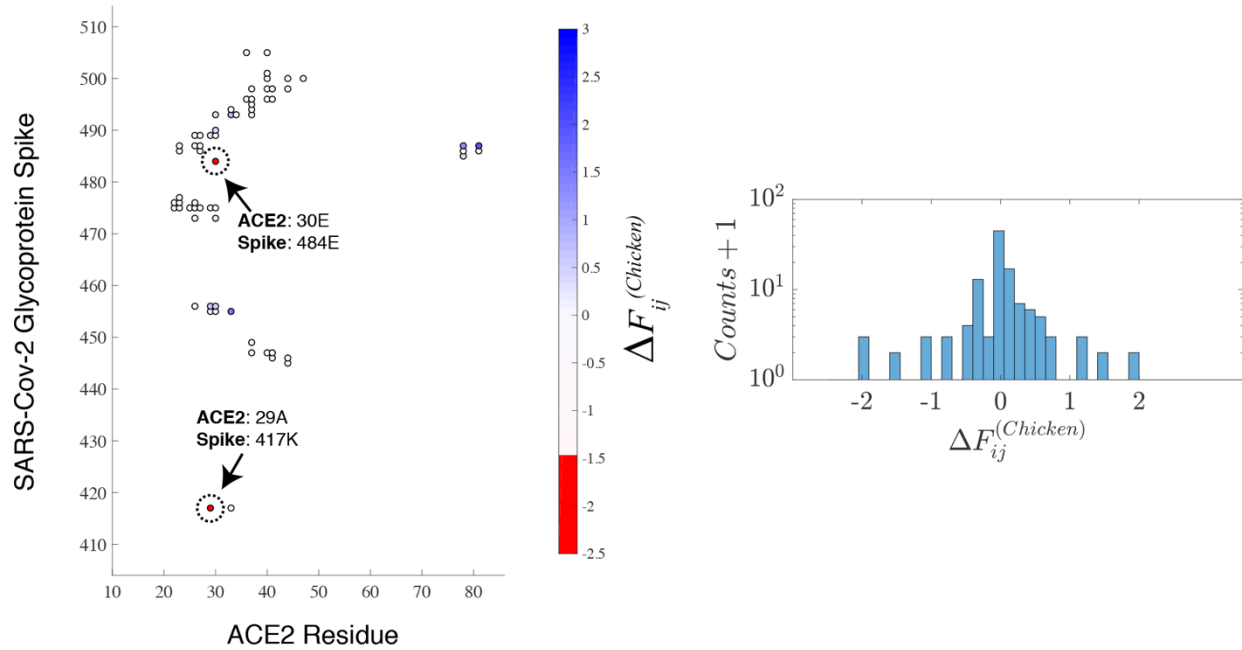

## B Duck ACE2-spike

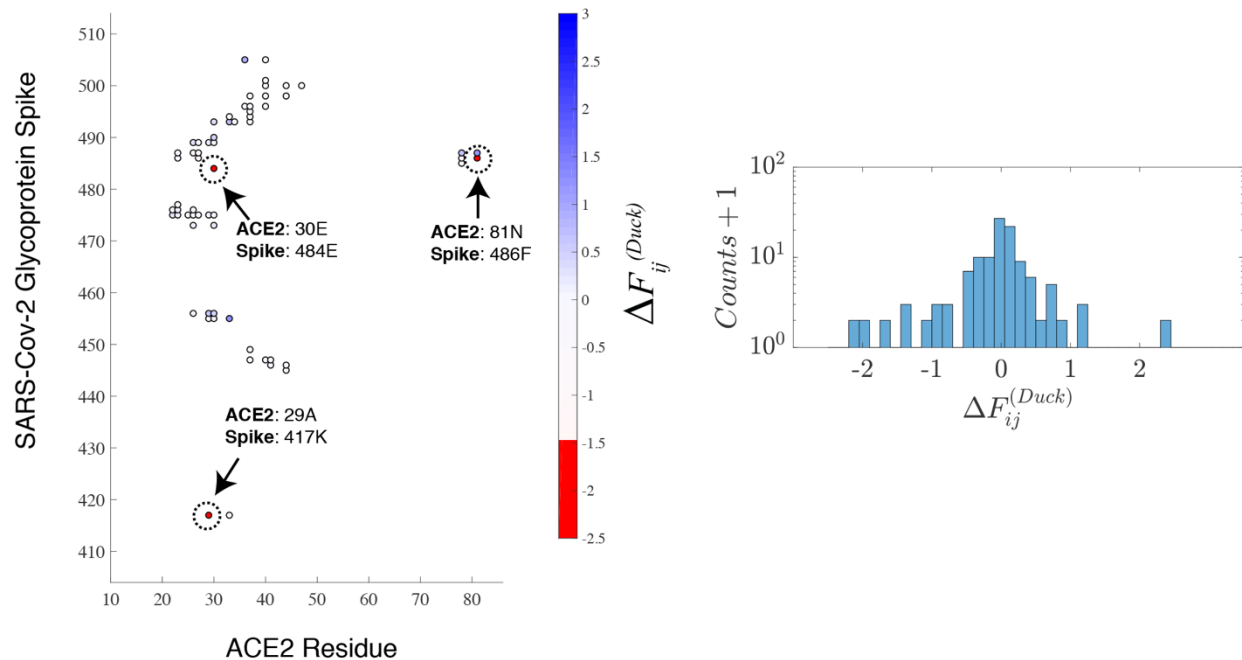

276  
277  
278  
279

280 **Figure S1. Comparative analysis of the frustration indices with respect to those observed in**  
281 **human ACE2-spike complex for additional examples of animals with known COVID-19**

282 **resistance.** The configurational frustration index relative to the frustration in the human ACE2-  
283 spike complex is shown for (A) chicken (*Gallus gallus domesticus*) and (B) duck (*Anas*  
284 *platyrhynchos*) on a contact map illustrating select contacts between the SARS-Cov-2 spike and  
285 the ACE2 protein. Corresponding histograms of the frustration index between all contacts  
286 between the ACE2 and spike protein are also shown. Animals that resist COVID-19 appear to  
287 have frustrated outliers that represent highly unfavorable residue interactions compared to the  
288 human ACE2-spike complex (i.e.,  $\Delta F_{ij}^{(Species)} < -1.5$ ). For the chicken, two highly frustrated  
289 interactions are identified: between (1) 30E of the ACE2 and 484E of the spike and (2) 29A of  
290 the ACE2 and 417K of the spike. For the duck, three highly frustrated interactions are identified:  
291 between (1) 30E of the ACE2 and 484E of the spike, (2) 29A of the ACE2 and 417K of the  
292 spike, and (3) 81N of the ACE2 and 486F of the spike. These frustrated interactions appear to  
293 confer COVID-19 resistance.

294

295

296

297

298

**A** White-tailed Deer (*Odocoileus virginianus*) ACE2-spike

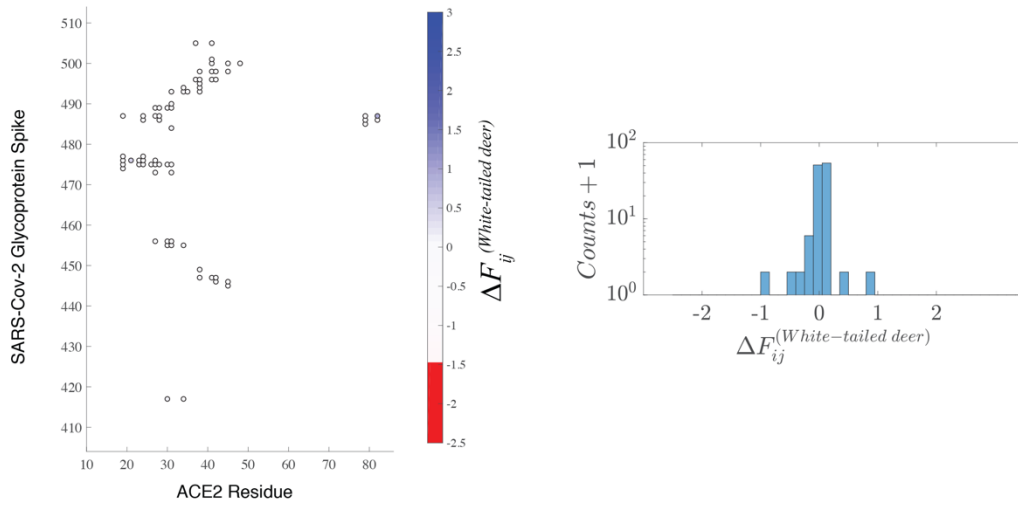

**B** European Rabbit (*Oryctolagus cuniculus*) ACE2-spike

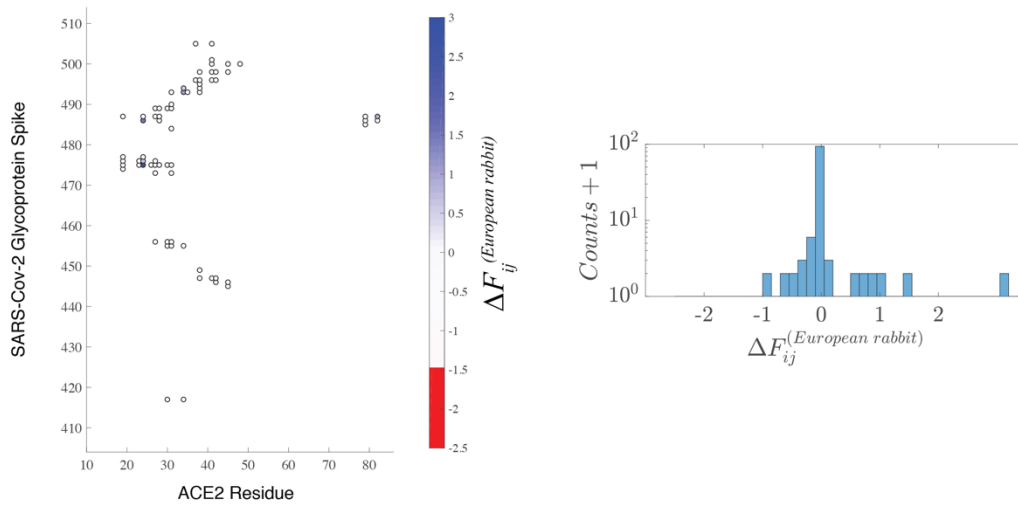

**C** Pig (*Sus*) ACE2-spike

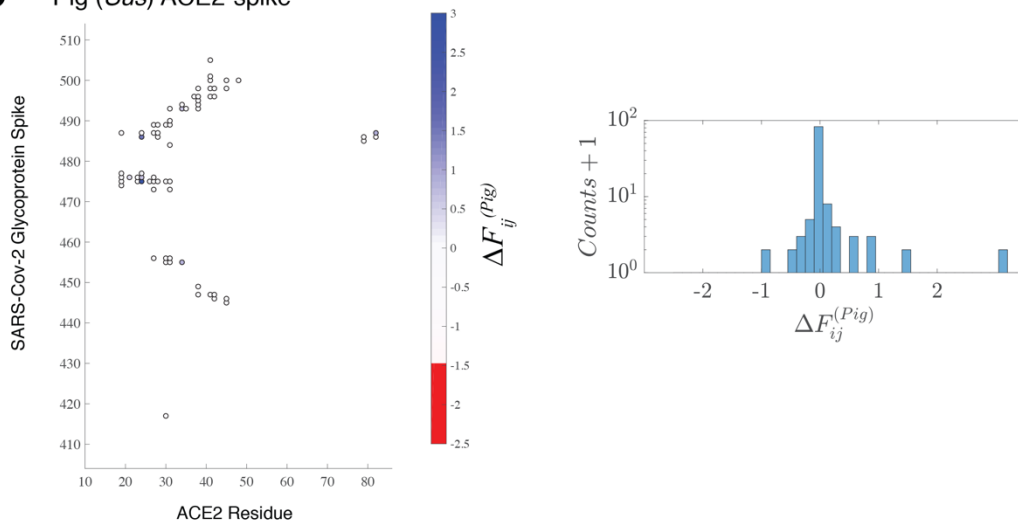



300 **Figure S2. Comparative analysis of the frustration indices with respect to those observed in**  
301 **human ACE2-spike complex for additional examples of animals with known COVID-19**  
302 **susceptibility.** The configurational frustration index relative to the frustration in the human  
303 ACE2-spike complex is shown for (A) white-tailed deer (*Odocoileus virginianus*), (B) European  
304 rabbit (*Oryctolagus cuniculus*), and (C) pig (*Sus*) on a contact map illustrating select contacts  
305 between the SARS-Cov-2 spike and the ACE2 protein. Corresponding histograms of the  
306 frustration index between all contacts between the ACE2 and spike protein are also shown.  
307 Animals that are susceptible to COVID-19 appear to have comparable levels of frustration  
308 compared to human ACE2-spike complex.

309  
310  
311  
312  
313  
314

315 Becker, D. J., Albery, G. F., Sjodin, A. R., Poisot, T., Dallas, T. A., Eskew, E. A., . . . Carlson,  
316 C. J. (2020). Predicting wildlife hosts of betacoronaviruses for SARS-CoV-2 sampling  
317 prioritization: a modeling study. *bioRxiv*, 2020.2005.2022.111344.  
318 doi:10.1101/2020.05.22.111344

319 BS, P., G, S., MM, P., C, E.-H., E, M., P, M., & CE, L. (2021). Susceptibility of Domestic Swine  
320 to Experimental Infection with Severe Acute Respiratory Syndrome Coronavirus 2.  
321 *Emerg Infect Dis.*, 27(1), 104-112. doi:<https://dx.doi.org/10.3201/eid2701.203399>

322 Damas, J., Hughes, G. M., Keough, K. C., Painter, C. A., Persky, N. S., Corbo, M., . . . Lewin,  
323 H. A. (2020). Broad host range of SARS-CoV-2 predicted by comparative and structural  
324 analysis of ACE2 in vertebrates. *Proceedings of the National Academy of Sciences*,  
325 117(36), 22311. doi:10.1073/pnas.2010146117

326 Davtayan, A., Schafer, N. P., Zheng, W., Clementi, C., Wolynes, P. G., & Papoian, G. A. (2012).  
327 AWSEM-MD: Protein Structure Prediction Using Coarse-Grained Physical Potentials  
328 and Bioinformatically Based Local Structure Biasing. *The Journal of Physical Chemistry*  
329 *B*, 116(29), 8494-8503. doi:10.1021/jp212541y

330 Dudchenko, O., Batra, S. S., Omer, A. D., Nyquist, S. K., Hoeger, M., Durand, N. C., . . . Aiden,  
331 E. L. (2017). De novo assembly of the &lt;em>Aedes aegypti</em> genome  
332 using Hi-C yields chromosome-length scaffolds. *Science*, 356(6333), 92.  
333 doi:10.1126/science.aal3327

334 Ferreiro, D. U., Hegler, J. A., Komives, E. A., & Wolynes, P. G. (2007). Localizing frustration in  
335 native proteins and protein assemblies. *Proceedings of the National Academy of Sciences*,  
336 104(50), 19819. doi:10.1073/pnas.0709915104

337 Frank, H. K., Enard, D., & Boyd, S. D. (2020). Exceptional diversity and selection pressure on  
338 SARS-CoV and SARS-CoV-2 host receptor in bats compared to other mammals.  
339 *bioRxiv*, 2020.2004.2020.051656. doi:10.1101/2020.04.20.051656

- 340 Gautam, A., Kaphle, K., Shrestha, B., & Phuyal, S. (2020). Susceptibility to SARS, MERS, and  
341 COVID-19 from animal health perspective. *Open Vet J*, *10*(2), 164-177.  
342 doi:10.4314/ovj.v10i2.6
- 343 Goldstein, J. (2020). Bronx Zoo Tiger Is Sick With the Coronavirus. *New York Times*. Retrieved  
344 from <https://www.nytimes.com/2020/04/06/nyregion/bronx-zoo-tiger-coronavirus.html>
- 345 Kumakamba, C., Niama, F. R., Muyembe, F., Mombouli, J.-V., Kingebeni, P. M., Nina, R. A., . . .  
346 . Lange, C. E. (2020). Coronavirus surveillance in Congo basin wildlife detects RNA of  
347 multiple species circulating in bats and rodents. *bioRxiv*, 2020.2007.2020.211664.  
348 doi:10.1101/2020.07.20.211664
- 349 Lam, S. D., Bordin, N., Waman, V. P., Scholes, H. M., Ashford, P., Sen, N., . . . Orengo, C. A.  
350 (2020). SARS-CoV-2 spike protein predicted to form complexes with host receptor  
351 protein orthologues from a broad range of mammals. *Scientific Reports*, *10*(1), 16471.  
352 doi:10.1038/s41598-020-71936-5
- 353 Li, W., Moore, M. J., Vasilieva, N., Sui, J., Wong, S. K., Berne, M. A., . . . Farzan, M. (2003).  
354 Angiotensin-converting enzyme 2 is a functional receptor for the SARS coronavirus.  
355 *Nature*, *426*(6965), 450-454. doi:10.1038/nature02145
- 356 Luan, J., Lu, Y., Jin, X., & Zhang, L. (2020). Spike protein recognition of mammalian ACE2  
357 predicts the host range and an optimized ACE2 for SARS-CoV-2 infection. *Biochemical  
358 and Biophysical Research Communications*, *526*(1), 165-169.  
359 doi:<https://doi.org/10.1016/j.bbrc.2020.03.047>
- 360 Madeira, F., Park, Y. M., Lee, J., Buso, N., Gur, T., Madhusoodanan, N., . . . Lopez, R. (2019).  
361 The EMBL-EBI search and sequence analysis tools APIs in 2019. *Nucleic Acids  
362 Research*, *47*(W1), W636-W641. doi:10.1093/nar/gkz268
- 363 Martínez-Hernández, F., Isaak-Delgado, A. B., Alfonso-Toledo, J. A., Muñoz-García, C. I.,  
364 Villalobos, G., Aréchiga-Ceballos, N., & Rendón-Franco, E. (2020). Assessing the  
365 SARS-CoV-2 threat to wildlife: Potential risk to a broad range of mammals. *Perspectives  
366 in Ecology and Conservation*. doi:<https://doi.org/10.1016/j.pecon.2020.09.008>
- 367 Melin, A. D., Janiak, M. C., Marrone, F., Arora, P. S., & Higham, J. P. (2020). Comparative  
368 ACE2 variation and primate COVID-19 risk. *Communications Biology*, *3*(1), 641.  
369 doi:10.1038/s42003-020-01370-w
- 370 Muñoz-Fontela, C., Dowling, W. E., Funnell, S. G. P., Gsell, P.-S., Riveros-Balta, A. X.,  
371 Albrecht, R. A., . . . Barouch, D. H. (2020). Animal models for COVID-19. *Nature*,  
372 *586*(7830), 509-515. doi:10.1038/s41586-020-2787-6
- 373 Mykytyn, A. Z., Lamers, M. M., Okba, N. M. A., Breugem, T. I., Schipper, D., van den Doel, P.  
374 B., . . . Haagmans, B. L. (2020). Susceptibility of rabbits to SARS-CoV-2. *bioRxiv*,  
375 2020.2008.2027.263988. doi:10.1101/2020.08.27.263988
- 376 Onuchic, J. N., Luthey-Schulten, Z., & Wolynes, P. G. (1997). THEORY OF PROTEIN  
377 FOLDING: The Energy Landscape Perspective. *Annual Review of Physical Chemistry*,  
378 *48*(1), 545-600. doi:10.1146/annurev.physchem.48.1.545
- 379 Onuchic, J. N., & Wolynes, P. G. (2004). Theory of protein folding. *Current Opinion in  
380 Structural Biology*, *14*(1), 70-75. doi:<https://doi.org/10.1016/j.sbi.2004.01.009>
- 381 Oude Munnink, B. B., Sikkema, R. S., Nieuwenhuijse, D. F., Molenaar, R. J., Munger, E.,  
382 Molenkamp, R., . . . Koopmans, M. P. G. (2021). Transmission of SARS-CoV-2 on mink  
383 farms between humans and mink and back to humans. *Science*, *371*(6525), 172.  
384 doi:10.1126/science.abe5901

- 385 Palmer, M. V., Martins, M., Falkenberg, S., Buckley, A., Caserta, L. C., Mitchell, P. K., . . . Diel,  
386 D. G. (2021). Susceptibility of white-tailed deer (&em&gt;Odocoileus  
387 virginianus&lt;/em&gt;) to SARS-CoV-2. *bioRxiv*, 2021.2001.2013.426628.  
388 doi:10.1101/2021.01.13.426628
- 389 Parra, R. G., Schafer, N. P., Radusky, L. G., Tsai, M.-Y., Guzovsky, A. B., Wolynes, P. G., &  
390 Ferreiro, D. U. (2016). Protein Frustratometer 2: a tool to localize energetic frustration in  
391 protein molecules, now with electrostatics. *Nucleic Acids Research*, 44(W1), W356-  
392 W360. doi:10.1093/nar/gkw304
- 393 Shang, J., Ye, G., Shi, K., Wan, Y., Luo, C., Aihara, H., . . . Li, F. (2020). Structural basis of  
394 receptor recognition by SARS-CoV-2. *Nature*, 581(7807), 221-224. doi:10.1038/s41586-  
395 020-2179-y
- 396 Shi, J., Wen, Z., Zhong, G., Yang, H., Wang, C., Huang, B., . . . Bu, Z. (2020). Susceptibility of  
397 ferrets, cats, dogs, and other domesticated animals to SARS–coronavirus 2. *Science*,  
398 368(6494), 1016. doi:10.1126/science.abb7015
- 399 Sia, S. F., Yan, L.-M., Chin, A. W. H., Fung, K., Choy, K.-T., Wong, A. Y. L., . . . Yen, H.-L.  
400 (2020). Pathogenesis and transmission of SARS-CoV-2 in golden hamsters. *Nature*,  
401 583(7818), 834-838. doi:10.1038/s41586-020-2342-5
- 402 Sit, T. H. C., Brackman, C. J., Ip, S. M., Tam, K. W. S., Law, P. Y. T., To, E. M. W., . . . Peiris,  
403 M. (2020). Infection of dogs with SARS-CoV-2. *Nature*, 586(7831), 776-778.  
404 doi:10.1038/s41586-020-2334-5
- 405 The UniProt, C. (2021). UniProt: the universal protein knowledgebase in 2021. *Nucleic Acids*  
406 *Research*, 49(D1), D480-D489. doi:10.1093/nar/gkaa1100
- 407 Wang, Q., Zhang, Y., Wu, L., Niu, S., Song, C., Zhang, Z., . . . Qi, J. (2020). Structural and  
408 Functional Basis of SARS-CoV-2 Entry by Using Human ACE2. *Cell*, 181(4), 894-  
409 904.e899. doi:<https://doi.org/10.1016/j.cell.2020.03.045>
- 410 Waterhouse, A., Bertoni, M., Bienert, S., Studer, G., Tauriello, G., Gumienny, R., . . . Schwede,  
411 T. (2018). SWISS-MODEL: homology modelling of protein structures and complexes.  
412 *Nucleic Acids Research*, 46(W1), W296-W303. doi:10.1093/nar/gky427
- 413 Yan, R., Zhang, Y., Li, Y., Xia, L., Guo, Y., & Zhou, Q. (2020). Structural basis for the  
414 recognition of SARS-CoV-2 by full-length human ACE2. *Science*, 367(6485), 1444.  
415 doi:10.1126/science.abb2762
- 416 Zhou, P., Yang, X.-L., Wang, X.-G., Hu, B., Zhang, L., Zhang, W., . . . Shi, Z.-L. (2020). A  
417 pneumonia outbreak associated with a new coronavirus of probable bat origin. *Nature*,  
418 579(7798), 270-273. doi:10.1038/s41586-020-2012-7
- 419
